# Supplementary material for: Fates of hemicellulose, lignin and cellulose in concentrated phosphoric acid with hydrogen peroxide (PHP) pretreatment
Source: Royal Society of Chemistry journal article supplement (doi:10.1039/c8ra00764k), 2018-01-01
Supplement: c8ra00764k1.pdf [file c8ra00764k1.pdf]

## Supporting information

### Fates of hemicellulose, lignin and cellulose in the concentrated phosphoric acid plus hydrogen peroxide (PHP) pretreatment

**Qing Wang<sup>a,b</sup>, Dong Tian<sup>a,b</sup>, Jinguang Hu<sup>c,d</sup>, Fei Shen<sup>a,b\*</sup>, Gang Yang<sup>a,b</sup>, Yanzong Zhang<sup>b</sup>, Shihuai Deng<sup>a,b</sup>, Jing Zhang<sup>a,b</sup>, Yongmei Zeng<sup>a,b</sup>, Yaodong Hu<sup>a,b</sup>**

*a. Institute of Ecological and Environmental Sciences, Sichuan Agricultural University, Chengdu, Sichuan 611130, P. R. China. E-mail: fishen@sicau.edu.cn*

*b. Rural Environment Protection Engineering & Technology Centre of Sichuan Province, Sichuan Agricultural University, Chengdu, Sichuan 611130, P. R. China.*

*c. Biomolecular materials, Department of Bioproducts and Biosystems, School of Chemical Engineering, Aalto University, P. O. Box 16300, FIN-00076, Aalto, Finland;*

*d. Forest Products Biotechnology, Department of Wood Science, the University of British Columbia, Vancouver V6T 1Z4, BC, Canada;*

\*Address correspondence to: [fishen@sicau.edu.cn](mailto:fishen@sicau.edu.cn)

Contents:

Five pages

Four figures (Figure S1, S2, S3, and S4)

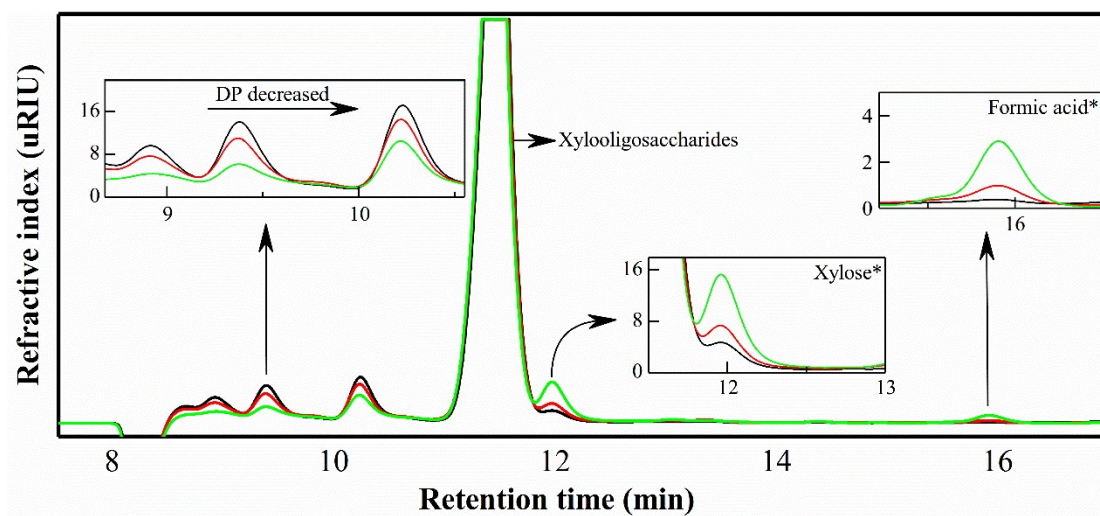

**Fig S1.** HPLC spectrum of xylan-based oligomeric and monomeric sugar in liquid fraction after PHP pretreatment,

\* xylose and formic acid were identified by their corresponding standard compounds.

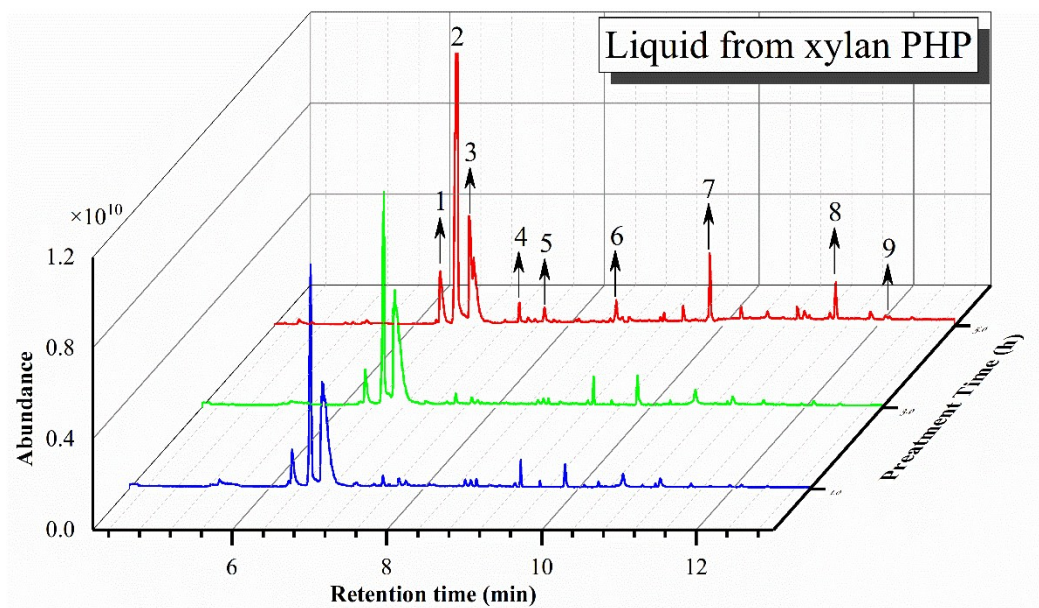

Fig S2. the GC/MS spectrum of the liquid fraction after PHP pretreatment

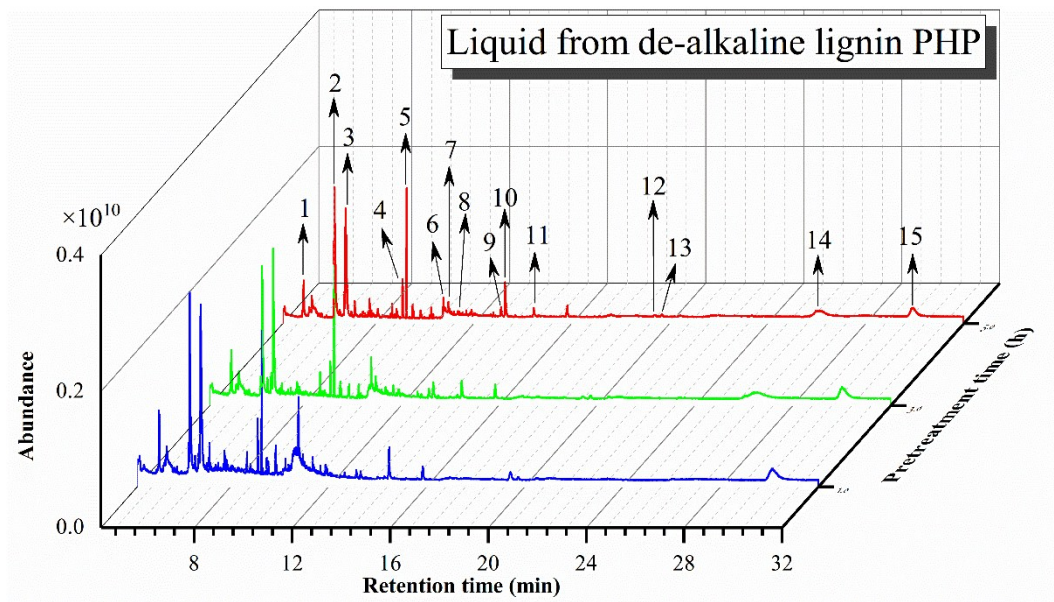

**Fig S3.** the GC/MS spectrum of the liquid fraction after PHP pretreatment

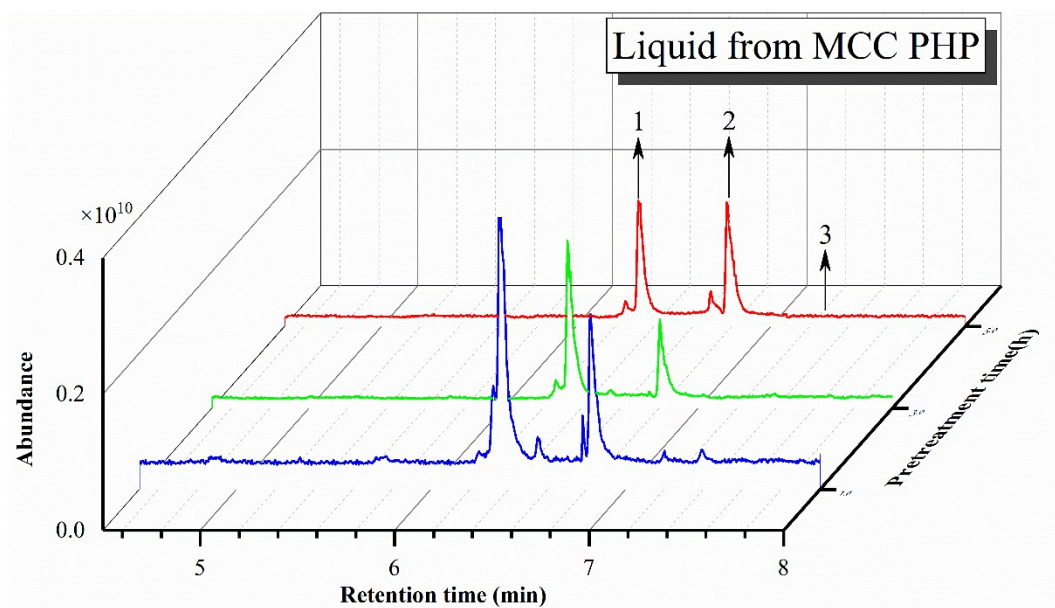

Fig S4. the GC/MS spectrum of the liquid fraction after PHP pretreatment
